# Supplementary material for: In situ dispersion of non-aqueous Fe3O4 nanocolloids by microdroplet coalescence and their use in the preparation of magnetic composite particles
Source: Royal Society of Chemistry journal article supplement (doi:10.1039/c6sm00628k), 2016-01-01
Supplement: c6sm00628k1.pdf [file c6sm00628k1.pdf]

## Electronic Supplementary Information

# **In situ dispersion of nonaqueous Fe<sub>3</sub>O<sub>4</sub> nanocolloids by microdroplet coalescence and their use in the preparation of magnetic composite particles**

Le Du,<sup>a</sup> Yujun Wang,<sup>b</sup> Jianhong Xu,<sup>b</sup> Chun Shen,<sup>\*c</sup> and Guangsheng Luo<sup>\*b</sup>

---

<sup>a</sup>The State Key Laboratory of Chemical Resource Engineering, Beijing Key Laboratory of Membrane Science and Technology, Beijing University of Chemical Technology, Beijing 100029, China

<sup>b</sup>The State Key Laboratory of Chemical Engineering, Department of Chemical Engineering, Tsinghua University, Beijing 100084, China. E-mail: [gsluo@tsinghua.edu.cn](mailto:gsluo@tsinghua.edu.cn).

<sup>c</sup>Beijing Key Laboratory of Bioprocess, College of Life Science and Technology, Beijing University of Chemical Technology, Beijing 100029, China. E-mail: [shenchun@mail.buct.edu.cn](mailto:shenchun@mail.buct.edu.cn).

**Table S1** Polydispersity indexes of the microdroplets at different conditions.

| Group                | 1     | 2     | 3     | 4     | 5     | 6     | 7     | 8     |
|----------------------|-------|-------|-------|-------|-------|-------|-------|-------|
| Droplet size (μm)    | 102   | 197   | 294   | 395   | 505   | 604   | 695   | 791   |
| Polydispersity index | 0.042 | 0.042 | 0.039 | 0.041 | 0.044 | 0.043 | 0.047 | 0.048 |

The polydispersity index (PDI) is calculated based on the initial droplet size:

$$\text{PDI} = \frac{1}{D_d} \sqrt{\frac{1}{n} \sum (d_d - D_d)^2} \times 100\%$$

$$\text{where } D_d = \frac{1}{n} \sum_1^n d_d, 50 \leq n \leq 100.$$
